# Supplementary material
Source: publisher site journal article supplement (https://www.dovepress.com/article/552924)
Supplement: Supplementary file 1 [file 552924%20Supplementary%20Materials.docx]

**Supplementary materials**

Supplementary table S1: Reliability and validity test

| **Inspection item** | **Cronbach's α** | **KMO** | **Bartlett (p)** | | **CVE** | **FLR** |
| --- | --- | --- | --- | --- | --- | --- |
| EQ (Utility value) | 0.712 | 0.711 | ＜0.001 | 54.4% | | 0.51-0.87 |
| EQ (VAS) | 0.733 | 0.721 | ＜0.001 | 57.1% | | 0.52-0.84 |
| SPPB | 0.743 | 0.832 | ＜0.001 | 61.2% | | 0.68-0.92 |
| FFP | 0.821 | 0.874 | ＜0.001 | 66.3% | | 0.64-0.89 |

Note: KMO: Kaiser-Meyer-Olkin; Bartlett: Bartlett sphericity test; CVE: Explanation rate of cumulative variance; FLR: Factor load range.

Supplementary table S2: Baseline data comparison

| **Parameters** | **EG (n=31)** | **CG (n=30)** | **p** | **Effect size** |
| --- | --- | --- | --- | --- |
| Sex | M: 15, F: 16 | M: 15, F:15 |  |  |
| Age | 82.42±5.48 | 80.43±4.76 | 0.64 | d: 0.272 |
| Height (cm) | 159.13±7.1 | 161.6±5.77 | 0.142 | d: 0.381 |
| Weight (kg) | 60.6 (50.65-66.7) | 59.75 (54.25-67.6) | 0.383 | r: 0.13 |
| Daily steps | 3280.14±267.17 | 3279.11±172.64 | 0.986 | d: 0.506 |
| BMI (kg/m2) | 23.37 (20.69-25.93) | 22.36 (21.43-26.73) | 0.702 | r: 0.057 |
| SMI (kg/m2) | 5.35 (5.24-6.52) | 5.46 (5.3-6.6) | 0.159 | r: 0.21 |
| SMM (kg) | 19.6 (17.4-21.2) | 19.2 (18.33-21.38) | 0.286 | r: 0.159 |
| BFM (kg) | 19.7 (17.3-23.95) | 19.35 (16.8-29.43) | 0.902 | r: 0.016 |
| SLM (kg) | 34.21±5.31 | 34.85±4.2 | 0.605 | d: 0.134 |
| FFM (kg) | 38.67±7.98 | 41.25±4.62 | 0.127 | d: 0.395 |
| HS-R (kg) | 17.33 (15.82-19.57) | 17.29 (16.68-20.29) | 0.436 | r: 0.116 |
| HS-L (kg) | 16.74 (15.92-18.07) | 16.47 (15.88-18.5) | 0.885 | r: 0.022 |
| TUG (s) | 15.54±2.78 | 15.12±0.97 | 0.433 | d: 0.2 |
| 6MWT(m) | 304 (285.5-308.5) | 308 (291.25-321.5) | 0.192 | r: 0.195 |
| GS (s) | 0.84 (0.79-0.86) | 0.86 (0.8-0.89) | 0.237 | r: 0.165 |
| TB (s) | 10.84±1.45 | 10.87±1.35 | 0.93 | d: 0.023 |
| 5 STS (s) | 15.12 (14.38-15.66) | 15 (14.42-15.61) | 0.96 | r: 0.008 |
| AC-R (30s, 2kg) | 12 (11-13) | 12 (11-12) | 0.656 | r: 0.065 |
| AC-L (30s, 2kg) | 12 (11-12) | 12 (11-13) | 0.67 | r: 0.266 |
| EQ-5D-5L | 0.76±0.02 | 0.74±0.03 | 0.82 | d: 0.032 |
| EQ-VAS | 68.58±4.15 | 63.53±4.18 | 0.76 | d: 0.111 |
| SPPB | 9 (8.5-9.5) | 9 (8-9) | 0.78 | r: 0.249 |
| FFP | 1 (1-2) | 2 (1-2) | 0.256 | r: 0.146 |

Note: d: Cohen’s d; r: Rank-Biserial correlation coefficient.

Supplementary table S3: Primary outcomes data comparison

| **Parameters** | **EG Post (n=31)** | **CG Post (n=30)** | **p** | **Effect size** |
| --- | --- | --- | --- | --- |
| SMI (kg/m2) | 5.79 (5.59-7.09)* | 5.43 (5.31-6.61) | 0.037 | r: 0.311 |
| SMM (kg) | 21.8 (19.6-24)* | 19.5 (18.22-21.25) | 0.017 | r: 0.339 |
| HS-R (kg) | 19.31 (18.58-21.78)* | 16.92 (16.35-20.04) | 0.029 | r: 0.407 |
| HS-L (kg) | 17.6 (17.11-20.42)* | 16.23 (15.55-18.24) | 0.048 | r: 0.295 |
| GS (s) | 0.9±0.1*** | 0.81±0.06 | <0.001 | d: 1.146 |
| 5 STS (s) | 13±0.84*** | 14.35±1.02 | <0.001 | d: 1.445 |
| **Parameters** | **EG Pre (n=31)** | **EG Post (n=31)** | **p** | **Effect size** |
| SMI (kg/m2) | 5.35 (5.24-6.52) | 5.79 (5.59-7.09)*** | <0.001 | r: 1 |
| SMM (kg) | 19.6 (17.4-21.2) | 21.8 (19.6-24)*** | <0.001 | r: 1 |
| HS-R (kg) | 17.33 (15.82-19.57) | 19.31 (18.58-21.78)*** | <0.001 | r: 1 |
| HS-L (kg) | 16.74 (15.92-18.07) | 17.6 (17.11-20.42)*** | <0.001 | r: 0.96 |
| GS (s) | 0.84 (0.79-0.86) | 0.89 (0.83-0.98)*** | <0.001 | r: 0.984 |
| 5 STS (s) | 15±0.84 | 13±0.84*** | <0.001 | d: 3.272 |
| **Parameters** | **CG Pre (n=30)** | **CG Post (n=30)** | **p** | **Effect size** |
| SMI (kg/m2) | 5.46 (5.3-6.6) | 5.43 (5.31-6.61)* | 0.014 | r: 0.52 |
| SMM (kg) | 19.2 (18.33-21.38) | 19.5 (18.22-21.25) | 0.45 | r: 0.102 |
| HS-R (kg) | 17.29 (16.68-20.29) | 16.92 (16.35-20.04)*** | <0.001 | r: 1 |
| HS-L (kg) | 16.47 (15.88-18.5) | 16.23 (15.55-18.24)*** | <0.001 | r: 0.983 |
| GS (s) | 0.86 (0.8-0.89) | 0.81±0.06*** | <0.001 | d: 3.868 |
| 5 STS (s) | 15 (14.42-15.61) | 14.37 (13.54-15.15) | 0.06 | r: 0.576 |

Note: Pre: before the experiment; Post: after the experiment; d: Cohen’s d; r: Rank-Biserial correlation coefficient; *,***: It was significant at 0.05, 0.001 level.

Supplementary table S4: Secondary outcomes data comparison

| **Parameters** | **EG Post (n=31)** | **CG Post (n=30)** | **p** | **Effect size** |
| --- | --- | --- | --- | --- |
| BFM (kg) | 18.83 (16.21-22.84) | 19.21 (17.24-29.27) | 0.471 | r: 0.108 |
| SLM (kg) | 36.27±5.71 | 34.9±4.15 | 0.293 | d: 0.272 |
| FFM (kg) | 39.68±8.24 | 41.28±4.63 | 0.354 | d: 0.238 |
| TUG (s) | 14.56±2.67* | 15.6±0.96 | 0.049 | d: 0.514 |
| 6MWT(m) | 325.77±37.58*** | 292.47±22.07 | <0.001 | d: 1.076 |
| TB (s) | 9.83±1.04*** | 10.89±1.31 | 0.001 | d: 0.9 |
| AC-R (30s, 2kg) | 13 (12-13)** | 11 (10-13) | 0.01 | r: 0.376 |
| AC-L (30s, 2kg) | 13 (13-14)** | 12 (11-13) | 0.009 | r: 0.593 |
| **Parameters** | **EG Pre (n=31)** | **EG Post (n=31)** | **p** | **Effect size** |
| BFM (kg) | 19.7 (17.3-23.95) | 18.83 (16.21-22.84)*** | <0.001 | r: 0.923 |
| SLM (kg) | 34.21±5.31 | 36.27±5.71*** | <0.001 | d: 0.829 |
| FFM (kg) | 38.67±7.98 | 39.68±8.24*** | <0.001 | d: 0.773 |
| TUG (s) | 15.54±2.78 | 14.56±2.67*** | <0.001 | d: 0.923 |
| 6MWT(m) | 304 (285.5-308.5) | 320 (299.5-351)*** | <0.001 | r: 0.966 |
| TB (s) | 10.84±1.45 | 9.83±1.04*** | <0.001 | d: 1.563 |
| AC-R (30s, 2kg) | 12 (11-13) | 13 (12-13)** | 0.005 | r: 0.644 |
| AC-L (30s, 2kg) | 12 (11-12) | 13 (13-14)*** | <0.001 | r: 1 |
| **Parameters** | **CG Pre (n=30)** | **CG Post (n=30)** | **p** | **Effect size** |
| BFM (kg) | 19.35 (16.8-29.43) | 19.21 (17.24-29.27) | 0.195 | r: 0.266 |
| SLM (kg) | 34.85±4.2 | 34.9±4.15 | 0.576 | d: 0.114 |
| FFM (kg) | 41.25±4.62 | 41.28±4.63 | 0.796 | d: 0.053 |
| TUG (s) | 15.12±0.97 | 15.6±0.96*** | <0.001 | d: 2.029 |
| 6MWT(m) | 307.83±22.99 | 292.47±22.07*** | <0.001 | d: 7.123 |
| TB (s) | 10.87±1.35 | 10.89±1.31 | 0.578 | d: 0.103 |
| AC-R (30s, 2kg) | 12 (11-12) | 11 (10-13) | 0.258 | r: 0.287 |
| AC-L (30s, 2kg) | 12 (11-13) | 12 (11-13) | 0.483 | r: 0.179 |

Note: Pre: before the experiment; Post: after the experiment; d: Cohen’s d; r: Rank-Biserial correlation coefficient; *,**,***: It was significant at 0.05, 0.01 ,0.001 level.

Supplementary table S5: Other outcomes data comparison

| **Parameters** | **EG Post (n=31)** | **CG Post (n=30)** | **p** | **Effect size** |
| --- | --- | --- | --- | --- |
| Weight (kg) | 59.8 (51.35-66.65) | 59.55 (54.45-67.4) | 0.457 | r: 0.111 |
| BMI (kg/m2) | 23.32 (21.38-26.04) | 22.23 (21.63-26.69) | 0.942 | r: 0.011 |
| EQ-5D-5L | 0.77±0.02*** | 0.72±0.04 | <0.001 | d: 1.745 |
| EQ-VAS | 69.13±4.22*** | 60.77±4.38 | <0.001 | d: 1.945 |
| SPPB | 10 (9-10)*** | 8 (7-9) | <0.001 | r: 0.673 |
| FFP | 2 (1-2) | 2 (1-2) | 0.359 | r: 0.117 |
| **Parameters** | **EG Pre (n=31)** | **EG Post (n=31)** | **p** | **Effect size** |
| Weight (kg) | 60.6 (50.65-66.7) | 59.8 (51.35-66.65) | 0.113 | r: 0.323 |
| BMI (kg/m2) | 23.65±4 | 23.8±3.96 | 0.062 | d: 0.347 |
| EQ-5D-5L | 0.76±0.02 | 0.77±0.02*** | <0.001 | d: 0.975 |
| EQ-VAS | 68.58±4.15 | 69.13±4.22** | 0.002 | d: 0.593 |
| SPPB | 9 (9-10) | 10 (9-10)*** | <0.001 | r: 1 |
| FFP | 1 (1-2) | 2 (1-2) | 0.394 | r: 0.182 |
| **Parameters** | **CG Pre (n=30)** | **CG Post (n=30)** | **p** | **Effect size** |
| Weight (kg) | 59.75 (54.25-67.6) | 59.55 (54.45-67.4) | 0.359 | r: 0.301 |
| BMI (kg/m2) | 22.36 (21.43-26.73) | 22.23 (21.63-26.69) | 0.387 | r: 0.148 |
| EQ-5D-5L | 0.74±0.03 | 0.72±0.04** | 0.002 | d: 0.61 |
| EQ-VAS | 63.53±4.18 | 60.77±4.38** | 0.006 | d: 0.544 |
| SPPB | 9 (8-9) | 8 (7-9) | 0.071 | r: 0.406 |
| FFP | 2 (1-2) | 2 (1-2) | 0.149 | r: 0.001 |

Note: Pre: before the experiment; Post: after the experiment; d: Cohen’s d; r: Rank-Biserial correlation coefficient; **,***: It was significant at 0.01 ,0.001 level.
